# Supplementary material
Source: PubMed Central journal article supplement (PMC2888238)

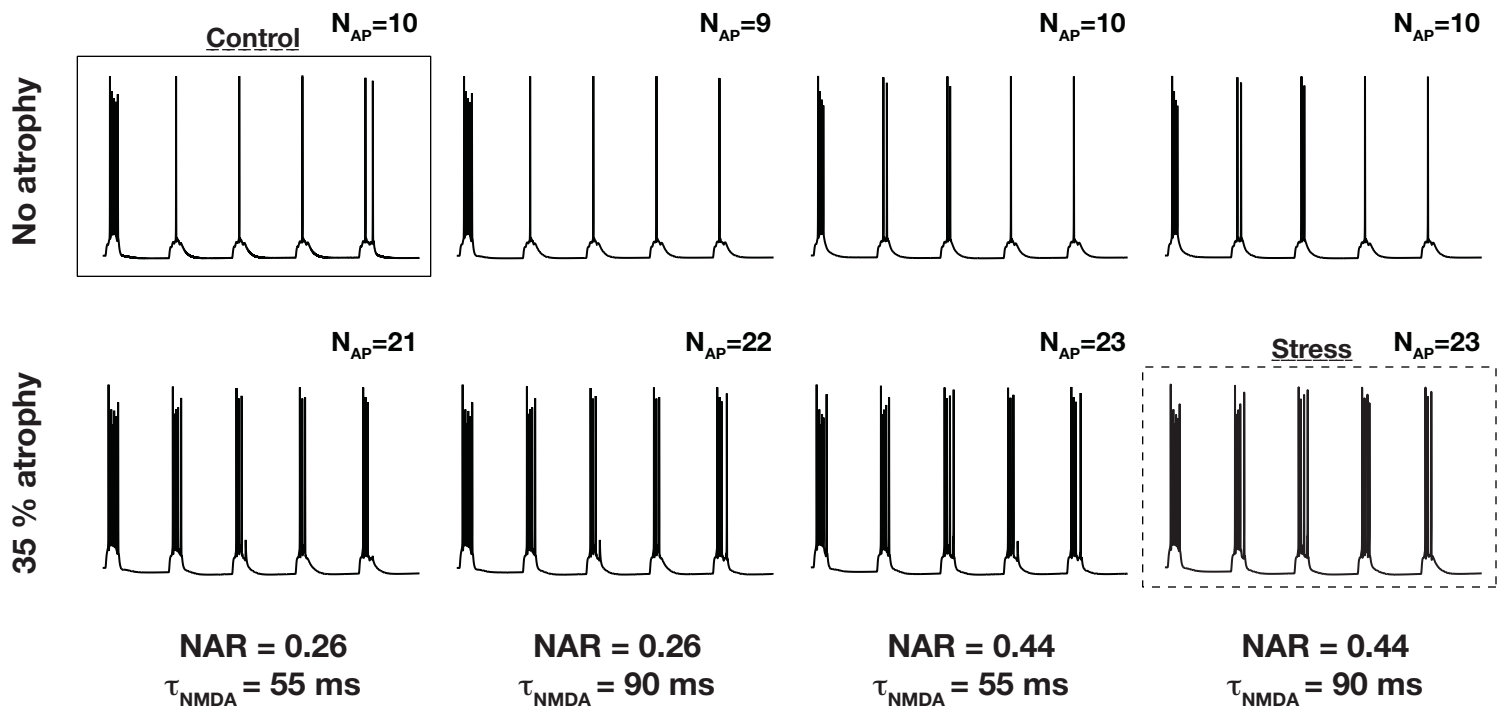

Supplement: supp_00913.2009_figS2.pdf [file supp_00913.2009_figS2.pdf]
